# Supplementary material
Source: PubMed Central journal article supplement (PMC4485365)
Supplement: Supp_Table1.pdf [file Supp_Table1.pdf]

## Supplementary Data

**Supplementary Table S1. Demographic, Anthropometric, and Laboratory Differences Between Metabolic Phenotypes by Degree of Obesity**

| Total<br>N=362                        | Insulin sensitive overweight/<br>obese (HOMA-IR <2.6)<br>N=157 |                              | Insulin resistant overweight/<br>obese (HOMA-IR ≥2.6)<br>N=205 |                              | p value |
|---------------------------------------|----------------------------------------------------------------|------------------------------|----------------------------------------------------------------|------------------------------|---------|
|                                       | Overweight<br>N=48                                             | Obese<br>N=109               | Overweight<br>N=41                                             | Obese<br>N=164               |         |
| Age, years                            | 8.9 ± 1.7 <sup>a,b</sup>                                       | 8.4 ± 1.5 <sup>c,e</sup>     | 10.5 ± 1.4 <sup>a,c,d</sup>                                    | 9.7 ± 1.6 <sup>b,d,e</sup>   | < 0.001 |
| Sex (% females)                       | 31 (65)                                                        | 41 (38)                      | 23 (56)                                                        | 92 (56)                      | 0.004   |
| Race/ethnicity, n (%)                 |                                                                |                              |                                                                |                              | 0.07    |
| Black                                 | 8 (17)                                                         | 19 (17)                      | 3 (7)                                                          | 35 (21)                      |         |
| Hispanic                              | 36 (75)                                                        | 86 (79)                      | 33 (80)                                                        | 114 (70)                     |         |
| Other                                 | 4 (8)                                                          | 4 (4)                        | 5 (12)                                                         | 15 (9)                       |         |
| Pubertal staging*                     |                                                                |                              |                                                                |                              | 0.001   |
| Prepubertal (Tanner stage 1)          | 16 (70)                                                        | 64 (82)                      | 8 (30)                                                         | 44 (47)                      |         |
| Early pubertal (Tanner stage 2 and 3) | 7 (30)                                                         | 12 (15)                      | 17 (63)                                                        | 49 (53)                      |         |
| Late pubertal (Tanner stage 4 and 5)  | 0                                                              | 2 (3)                        | 2 (7)                                                          | 0                            |         |
| Height, cm                            | 136.1 ± 11.8 <sup>a,b,c</sup>                                  | 134.9 ± 9.2 <sup>b,d,e</sup> | 145.6 ± 9.8 <sup>a,d</sup>                                     | 144.9 ± 11.1 <sup>c,e</sup>  | < 0.001 |
| Weight, kg                            | 39.3 ± 9.8 <sup>a,b,c</sup>                                    | 45.3 ± 10.5 <sup>b,e</sup>   | 47.9 ± 8.4 <sup>a,d</sup>                                      | 59.7 ± 15.3 <sup>c,d,e</sup> | < 0.001 |
| BMI, kg/m <sup>2</sup>                | 20.9 ± 1.8 <sup>a,b</sup>                                      | 24.6 ± 3.17 <sup>a,c,e</sup> | 22.4 ± 1.7 <sup>c,d</sup>                                      | 28 ± 4.1 <sup>b,d,e</sup>    | < 0.001 |
| BMI z-score                           | 1.40 ± 0.21 <sup>a,b</sup>                                     | 2.10 ± 0.28 <sup>a,c,e</sup> | 1.40 ± 0.19 <sup>c,d</sup>                                     | 2.20 ± 0.29 <sup>b,d,e</sup> | < 0.001 |
| Waist circumference, cm               | 72.3 ± 7.5 <sup>a,b,c</sup>                                    | 78.4 ± 8.2 <sup>b,e</sup>    | 78.1 ± 6.1 <sup>a,d</sup>                                      | 89 ± 10.7 <sup>c,d,e</sup>   | < 0.001 |
| SBP, mm Hg                            | 101 ± 8 <sup>a</sup>                                           | 104 ± 9 <sup>c</sup>         | 105 ± 8 <sup>b</sup>                                           | 110 ± 12 <sup>a,b,c</sup>    | < 0.001 |
| DBP, mm Hg                            | 57 ± 5 <sup>a</sup>                                            | 59 ± 5 <sup>b</sup>          | 57 ± 6                                                         | 60 ± 6 <sup>a,b</sup>        | 0.003   |
| Light PA, min                         | 448 ± 106                                                      | 432 ± 93                     | 432 ± 130                                                      | 418 ± 107                    | 0.48    |
| MVPA, min                             | 78 ± 46                                                        | 83 ± 51 <sup>a,b</sup>       | 50 ± 28 <sup>a</sup>                                           | 61 ± 40 <sup>b</sup>         | < 0.001 |
| Sedentary activity, min               | 419 ± 114                                                      | 443 ± 112                    | 486 ± 132                                                      | 465 ± 109                    | 0.06    |
| TGs, mg/dL**                          | 60 (41, 78)                                                    | 66 (48, 92)                  | 76 (56, 98)                                                    | 88 (60, 117)                 | < 0.001 |
| HDL-C, mg/dL                          | 50 ± 10 <sup>a</sup>                                           | 47 ± 9 <sup>b</sup>          | 47 ± 8                                                         | 44 ± 9 <sup>ab</sup>         | < 0.001 |
| Fasting plasma glucose, mg/dL         | 82 ± 8 <sup>a,b</sup>                                          | 81 ± 10 <sup>c,d</sup>       | 89 ± 8 <sup>a,c</sup>                                          | 88 ± 8 <sup>b,d</sup>        | < 0.001 |
| Fasting Insulin, u/L**                | 8.3 (5.6, 10.6)                                                | 9.3 (7.4, 11.3)              | 17.8 (15.3, 21.5)                                              | 20.6 (16.2, 28.5)            | < 0.001 |
| hs-CRP, mg/dL**                       | 0.9 (0.4, 1.5)                                                 | 1.6 (0.7, 3.9)               | 0.7 (0.5, 2.1)                                                 | 2.2 (1.1, 5.5)               | < 0.001 |
| ALT, U/L                              | 21 ± 9                                                         | 26 ± 23                      | 23 ± 7                                                         | 28 ± 16                      | 0.086   |
| PNFI                                  | 2.08 (0.63, 4.61)                                              | 5.85 (3.55, 8.64)            | 3.5 (1.82, 4.95)                                               | 8.89 (6.95, 9.74)            | < 0.001 |
| Albumin/creatinine ratio              | 24 ± 111                                                       | 16 ± 35                      | 8.4 ± 13.7                                                     | 16.1 ± 50.1                  | 0.423   |

All values are presented as mean ± standard deviation, unless otherwise indicated.

\*Pubertal staging was available for 221 (61%) participants.

\*\*Median (interquartile range).

SBP, systolic blood pressure; DBP, diastolic blood pressure; PA, physical activity; MVPA, moderate-to-vigorous physical activity; TGs, triglycerides; HDL-C, high-density lipoprotein-cholesterol; hs-CRP, high-sensitivity C-reactive protein; ALT, alanine aminotransferase; PNFI, pediatric NAFLD fibrosis index; HOMA-IR, homeostatic model assessment for insulin resistance.

Same superscript letters indicate a significant difference between those subgroups.
